# Supplementary material for: Investigation of geographic disparities and temporal changes of non-gestational diabetes-related emergency department visits in Florida: a retrospective ecological study
Source: PeerJ. 2025 Jan 31;13:e18897. doi: 10.7717/peerj.18897 (PMC11789650; doi:10.7717/peerj.18897)
Supplement: Supplemental Information 1 [file peerj-13-18897-s001.xlsx]

## Sheet: Full Dataset
CNTY_ID	CNTY_FIPS	NAME	County	Population_2016	Diabed_2016	Diabed_2016_per100k	Population_2017	Diabed_2017	Diabed_2017_per100k	Population_2018	Diabed_2018	Diabed_2018_per100k	Population_2019	Diabed_2019	Diabed_2019_per100k	Diabedvst_19_100k	Log_diab	Crude_diab_perc	DSME_perc	Depression	Heavy_drinker	Disability	HTN	Kidney	CHECKUP	CHOLMED	MI_CHD	Stroke	Arthritis	Insurance	See_doc	Personal_doc	Poor_Health	Good_health	BMI_Normal	BMI_Obese	BMI_Overweight	BMI_underweight	Current_smoker	Ever_smoked	Tobacco_snuff	Diabage	ecig	High_chol	BP_med	Veg_1_more	Fruits_1_more	Highly_active	Active
1	1	Alachua	Alachua County, Florida	257478	8946	3474.47	259349	10128	3905.16	263753	10532	3993.13	266649	10280	3855.26	3855.26	8.25719	11.1739	64.144	16.7167	6.96066	21.2657	26.6317	2.90728	76.0072	56.1381	3.01096	2.69677	19.4726	86.8446	13.7588	69.2884	11.1922	88.8078	40.1164	29.7745	27.5296	2.57953	11.393	29.983	3.15174	48.2274	6.60493	24.7407	77.1814	82.9787	62.9456	34.234	22.0859
2	3	Baker	Baker County, Florida	26967	637	2362.15	27066	900	3325.21	27488	1040	3783.47	28089	1326	4720.71	4720.71	8.45971	13.8154	45.3972	17.5099	6.98601	34.683	36.5712	3.22854	78.4394	60.9425	6.20047	4.4921	30.0508	78.8127	21.8449	76.8244	25.477	74.523	26.6097	36.4448	34.2756	2.66147	29.6838	55.6802	11.0779	48.8044	2.22607	32.8265	82.4079	87.5906	52.4682	24.3533	13.1061
3	5	Bay	Bay County, Florida	176637	6082	3443.22	178953	5896	3294.72	182218	6733	3695.02	179900	6918	3845.47	3845.47	8.25465	11.6211	51.7421	20.0384	5.51567	33.368	36.8207	4.3354	72.5779	62.0929	4.73057	4.51422	28.8684	84.0163	16.4299	69.9069	20.9421	79.0579	30.4106	29.8533	36.4206	3.31465	22.1258	48.9008	4.37436	46.9644	9.1129	28.3469	74.8706	84.7626	57.2318	36.782	14.6765
4	7	Bradford	Bradford County, Florida	27498	1909	6942.32	27808	1910	6868.53	28083	1964	6993.55	28455	1924	6761.55	6761.55	8.81901	12.3276	41.7527	20.5281	6.51377	35.0494	44.1421	5.07782	78.1383	61.0953	5.36339	3.7296	27.9522	80.6172	18.2989	73.8081	23.9861	76.0139	30.6586	35.8376	30.3903	3.11414	27.1249	48.1501	8.30552	46.4483	4.81015	30.1791	78.8362	86.7423	59.8599	32.2617	14.1787
5	9	Brevard	Brevard County, Florida	570496	19486	3415.62	576970	21329	3696.73	584050	21129	3617.67	593372	22072	3719.76	3719.76	8.22141	12.7833	56.8571	21.6893	7.18593	30.1602	37.5336	3.56512	78.761	57.2033	4.85814	6.11794	31.4185	84.6911	15.8546	78.3972	21.0198	78.9802	31.5974	30.738	36.6343	1.03038	16.3328	45.5892	3.05457	49.5981	6.71303	34.7551	80.2051	81.7477	68.1866	33.7955	16.3187
6	11	Broward	Broward County, Florida	1860979	60872	3270.97	1884545	65105	3454.68	1903210	65990	3467.3	1927014	70340	3650.21	3650.21	8.20254	11.4583	49.9068	13.0399	5.62814	29.7984	33.6857	3.03122	80.8154	53.4032	3.43825	4.76312	20.3852	82.2658	18.546	72.7643	18.794	81.206	33.3119	27.1288	37.8865	1.67278	12.5511	34.7849	2.30139	48.5351	4.29137	33.5343	80.9558	77.9807	69.4536	31.3224	16.8483
7	13	Calhoun	Calhoun County, Florida	14594	605	4145.54	14658	473	3226.91	15315	683	4459.68	14982	820	5473.23	5473.23	8.60763	13.2454	41.5496	19.2304	9.54212	41.0321	35.5389	2.72932	69.2924	65.4564	6.35146	4.76124	27.292	81.7701	17.8499	79.3042	26.3932	73.6068	27.4421	34.9691	35.2735	2.31881	20.1932	46.9447	9.19308	49.5757	6.54223	34.7255	80.608	77.7811	56.8025	33.7782	10.9321
8	15	Charlotte	Charlotte County, Florida	171219	4988	2913.23	173954	5559	3195.67	175413	5819	3317.31	182298	5715	3134.98	3134.98	8.05038	14.8777	60.6687	18.7515	9.67655	36.4655	41.451	3.41001	81.9112	64.4869	7.79472	5.31502	38.0052	88.1349	14.162	80.9144	21.1155	78.8845	31.1359	27.3671	39.4869	2.0094	15.3916	57.281	2.22636	53.5162	5.6631	41.0769	80.6463	83.0443	60.8495	43.18	15.1857
9	17	Citrus	Citrus County, Florida	143458	4507	3141.69	144922	5148	3552.26	145164	4916	3386.51	147735	3794	2568.11	2568.11	7.85093	16.7004	39.8105	19.1637	7.48564	42.6849	46.9814	4.72627	80.684	68.0841	7.897	4.7548	40.2071	87.8662	18.7485	78.3701	22.0808	77.9192	30.231	31.1547	36.3012	2.31227	19.8003	58.3496	3.1456	52.4314	7.11008	43.7038	85.1171	82.5121	61.7127	40.0017	14.1206
10	19	Clay	Clay County, Florida	206387	6739	3265.23	210767	8097	3841.68	213565	8909	4171.56	217109	9115	4198.35	4198.35	8.34245	13.6254	44.3089	19.102	7.69124	34.2606	38.4529	3.86421	76.0814	56.5291	5.35057	5.38288	27.936	86.3831	13.6098	75.8844	21.7311	78.2689	29.2234	34.6056	34.3221	1.84823	22.234	48.1389	2.97297	50.0405	6.3317	30.5296	78.5839	82.8926	58.9456	34.455	17.6884
11	21	Collier	Collier County, Florida	351768	7838	2228.17	358506	7610	2122.7	367471	7541	2052.13	377700	7108	1881.92	1881.92	7.54005	10.4751	59.9537	11.4568	8.5889	23.7608	35.2002	2.71022	77.1527	64.1569	4.42993	3.07148	26.0908	83.9641	13.681	73.9409	17.2845	82.7155	34.685	23.1036	40.7519	1.45954	11.6934	41.4291	1.70975	49.696	3.3522	32.4954	77.5386	77.4754	64.1787	37.8036	15.3058
12	23	Columbia	Columbia County, Florida	68687	4344	6324.34	69250	4247	6132.85	69566	4466	6419.8	70614	4630	6556.77	6556.77	8.78825	16.484	38.4228	22.7161	6.35776	40.494	44.0324	3.55618	75.8936	65.8279	6.12569	6.06655	31.2832	83.1828	15.6097	74.8366	25.06	74.94	23.7872	35.1561	38.2254	2.83136	23.8952	48.1121	7.43875	50.1017	7.27715	34.3578	75.7046	83.6529	55.6883	30.847	13.0443
13	27	DeSoto	DeSoto County, Florida	35215	742	2107.06	35454	1292	3644.16	35940	1389	3864.77	35718	1737	4863.09	4863.09	8.48943	14.754	64.8241	14.5561	8.49661	31.1629	34.8744	4.61621	73.7682	65.2041	4.57508	4.87165	27.8746	68.5533	18.0676	63.6605	23.5633	76.4367	27.0351	30.5917	40.7379	1.63504	18.335	46.6521	11.6409	48.2779	5.2063	33.7873	79.7001	78.1438	56.8288	31.4584	14.391
14	29	Dixie	Dixie County, Florida	16844	541	3211.83	17040	639	3750	16767	729	4347.83	16516	728	4407.85	4407.85	8.39114	12.9116	48.9378	16.3979	7.26075	45.8614	42.8045	5.2391	76.0216	58.2613	6.53248	5.46606	38.7728	80.6543	21.4327	75.6498	32.5023	67.4977	26.8827	34.1762	35.7645	3.18184	29.4898	55.9927	13.5237	44.6389	6.3606	34.6681	80.6093	81.2483	59.8884	31.1793	12.2294
15	31	Duval	Duval County, Florida	927903	38837	4185.46	942841	45211	4795.19	954454	47051	4929.62	971842	47579	4895.75	4895.75	8.49612	12.8505	62.3687	23.917	6.44649	31.4041	37.5653	3.61458	77.3052	59.6026	6.34417	3.85094	26.5254	85.8376	17.4412	76.2206	22.3177	77.6823	29.0489	32.9876	35.4698	2.49371	16.3584	37.8161	2.65293	46.8366	5.61433	30.3068	79.8783	83.6777	60.5531	34.6542	13.833
16	33	Escambia	Escambia County, Florida	310642	15028	4837.72	312811	14129	4516.78	317051	14011	4419.16	322901	16641	5153.59	5153.59	8.54745	12.8248	75.3011	19.9452	8.1392	33.3154	36.2065	2.30891	77.3152	63.2898	2.82791	5.74569	29.6185	80.0029	15.6344	71.6834	23.1927	76.8073	29.8108	31.6058	36.3216	2.26231	16.5998	41.7175	4.98982	47.4063	6.91525	27.6967	78.8305	80.7517	61.0791	30.8607	18.1897
17	35	Flagler	Flagler County, Florida	103584	1891	1825.57	106076	2850	2686.75	108481	2959	2727.67	110636	4205	3800.75	3800.75	8.24295	12.0386	62.538	17.594	6.68238	32.97	39.617	3.87361	81.209	62.0529	6.88175	4.4043	28.736	88.0517	15.8641	77.8563	18.9143	81.0857	34.3747	28.5979	35.8227	1.20471	19.9584	53.5341	1.92772	52.6709	5.07384	35.6024	79.3415	83.9876	64.4937	45.9213	12.8062
18	37	Franklin	Franklin County, Florida	11937	753	6308.12	12006	751	6255.21	12360	666	5388.35	12017	607	5051.18	5051.18	8.52738	9.85417	53.1444	13.5445	11.5187	35.9476	40.6419	3.20312	74.1591	62.7557	4.56316	4.05202	25.5556	78.361	17.4165	72.3926	22.3643	77.6357	27.5505	34.6421	34.587	3.22675	24.1975	54.2153	7.70876	50.7322	4.0986	35.0374	79.5897	83.6859	55.1244	33.8343	9.18235
19	39	Gadsden	Gadsden County, Florida	48527	4271	8801.29	48690	4444	9127.13	48173	4919	10211.1	47926	4877	10176.1	10176.1	9.2278	19.8807	56.0388	18.2285	2.34337	39.9767	46.9761	4.42387	78.5775	65.6829	4.98606	3.54206	26.5436	75.0506	21.7942	80.1745	29.5266	70.4734	26.6446	48.062	24.6103	0.684184	15.1408	34.3292	2.11296	49.2751	6.48636	29.3486	73.9269	74.2397	64.027	28.4962	14.86
20	41	Gilchrist	Gilchrist County, Florida	16862	506	3000.83	16977	592	3487.07	17578	619	3521.45	17682	640	3619.5	3619.5	8.19409	19.0302	48.1358	23.7749	2.96104	44.5309	40.2682	4.19248	63.1857	59.9707	8.03712	5.45818	36.915	79.0655	17.3484	67.7068	33.125	66.875	19.4254	41.6371	36.0723	2.86273	19.2775	43.6813	9.19483	48.5651	5.8582	30.7687	74.9908	93.3305	55.1928	32.1067	19.7547
21	43	Glades	Glades County, Florida	13101	307	2343.33	13263	307	2314.71	13193	338	2561.96	13098	377	2878.3	2878.3	7.96496	20.7912	49.4637	16.3281	11.6792	36.8042	44.3359	4.04093	72.4138	69.3396	5.63476	3.51469	34.6455	81.5385	21.19	64.979	24.9446	75.0554	20.5885	35.0166	43.4551	0.946125	15.3095	48.8405	5.44921	51.4737	1.99702	34.5997	83.2638	80.2616	56.2014	31.8712	15.8304
22	45	Gulf	Gulf County, Florida	16718	969	5796.15	16957	806	4753.2	16235	839	5167.85	16507	744	4507.18	4507.18	8.41343	15.3193	65.955	20.4633	6.83508	40.098	40.8186	3.56064	72.2505	64.8918	7.69902	5.08271	28.7452	78.4314	18.8509	68.8535	26.833	73.167	30.0301	29.6821	38.4372	1.85741	23.9759	51.9414	7.40938	44.5385	7.97564	30.5547	81.1581	81.0935	50.7238	34.3739	13.077
23	47	Hamilton	Hamilton County, Florida	14666	650	4432.02	14749	715	4847.79	14706	795	5405.96	14787	884	5978.22	5978.22	8.69588	16.2947	32.0427	14.213	5.82583	35.2184	46.3839	4.58406	76.45	65.2812	8.97033	6.80902	25.2566	80.5726	14.9664	71.6451	28.1455	71.8545	25.459	43.7414	29.8519	0.942933	20.1949	45.6148	8.37453	48.8659	3.02373	30.0027	81.5315	77.1461	54.5497	34.4202	13.7493
24	49	Hardee	Hardee County, Florida	27643	1386	5013.93	27675	1717	6204.16	27436	1373	5004.37	27311	1902	6964.23	6964.23	8.84854	16.4589	41.8328	11.4642	6.17198	31.3868	27.5953	4.30709	73.4203	60.1626	5.53482	3.40257	23.4995	70.0489	18.5832	66.1457	28.3529	71.6471	25.5741	35.1621	36.5469	2.71391	20.7355	40.6458	7.50864	47.4203	4.76346	30.6265	82.8822	76.0993	58.9044	25.1026	10.5384
25	51	Hendry	Hendry County, Florida	38436	1918	4990.11	38675	2096	5419.52	39682	2160	5443.27	40089	2353	5869.44	5869.44	8.67751	14.0944	29.5601	10.3957	4.91746	32.4454	35.1923	3.67498	72.7419	62.082	3.3196	4.94133	18.332	69.3968	15.4694	57.6092	27.0649	72.9351	25.2353	43.4047	29.6594	1.69953	18.0647	35.0296	4.52014	42.3941	4.41713	23.9966	77.4527	66.5795	60.872	25.3745	10.9124
26	53	Hernando	Hernando County, Florida	180213	6374	3536.93	183065	6741	3682.3	185421	7226	3897.08	189661	7462	3934.39	3934.39	8.27751	14.5769	53.4925	21.6011	4.2275	37.2825	36.1718	4.46913	76.1618	67.067	6.96736	4.70699	35.8549	82.5622	16.478	74.7913	24.8943	75.1057	29.9038	30.7148	37.6112	1.77012	21.4995	54.2946	1.92647	47.9947	7.31054	36.6768	84.4863	82.64	64.0372	39.0078	10.7643
27	55	Highlands	Highlands County, Florida	101727	5276	5186.43	102590	5785	5638.95	103317	5276	5106.61	103391	5425	5247.07	5247.07	8.56543	18.0087	44.0575	18.0322	5.73699	40.7277	42.5864	4.55402	78.6602	65.5251	7.63082	5.86417	32.0873	83.4142	13.4556	77.7789	25.927	74.073	31.7763	29.1051	36.5489	2.56958	16.5464	48.9582	3.5793	49.2446	3.12809	34.5621	83.2069	82.4649	65.2458	33.4392	14.225
28	57	Hillsborough	Hillsborough County, Florida	1359850	44694	3286.69	1388111	49253	3548.2	1419285	49887	3514.94	1445243	51350	3553.04	3553.04	8.17556	10.8694	53.8909	16.7662	6.66026	27.1281	33.3058	3.58037	77.2366	49.1916	4.11585	3.34185	23.6925	84.4808	15.5505	68.647	18.4267	81.5733	29.4395	30.1821	38.6007	1.77772	15.9698	39.1556	3.41588	45.9308	5.71897	30.7294	78.1191	75.1051	61.6582	28.6862	18.8491
29	59	Holmes	Holmes County, Florida	20037	561	2799.82	20132	908	4510.23	20404	990	4851.99	20218	844	4174.5	4174.5	8.33675	18.4344	51.0123	19.8762	5.12613	38.9776	42.7975	6.25211	76.7068	64.2949	6.33692	5.94022	34.3724	80.9912	17.9985	76.9062	27.767	72.233	21.1168	43.6312	32.5324	2.72583	23.9854	47.8249	8.89005	45.5614	6.90783	30.4291	82.5762	84.8578	49.3311	26.5529	11.6117
30	61	Indian River	Indian River County, Florida	147163	4800	3261.69	149930	5492	3663.04	152079	6165	4053.81	155308	6356	4092.51	4092.51	8.31691	11.761	48.389	15.8425	11.1927	33.4394	37.6836	3.62855	77.3261	54.9029	6.56522	4.62274	30.3246	83.3346	13.246	74.9465	18.593	81.407	37.9547	25.6035	34.099	2.34269	15.9385	50.7534	1.89366	52.8332	4.21053	35.2599	75.6595	86.6553	68.1942	45.3392	11.1438
31	63	Jackson	Jackson County, Florida	50311	2543	5054.56	50303	3232	6425.06	50689	3405	6717.43	50325	2966	5893.69	5893.69	8.68164	18.754	46.8807	18.4539	7.3569	39.8681	44.609	3.98619	73.756	67.5901	5.97701	4.9387	30.9631	83.3101	16.8538	76.218	25.7555	74.2445	23.7334	40.2524	33.8911	2.12359	26.0425	47.5055	10.429	50.1323	5.81214	30.0466	77.1317	87.6858	55.8076	29.9326	10.509
32	65	Jefferson	Jefferson County, Florida	14501	736	5075.51	14530	753	5182.38	14725	818	5555.18	14842	778	5241.88	5241.88	8.56444	14.3767	61.5028	10.3218	8.95171	33.7985	42.0745	2.4613	72.3249	65.083	5.83749	5.7738	29.2666	85.5254	16.0325	78.1013	20.0735	79.9265	29.6099	29.0682	35.924	5.39423	17.0609	43.0185	4.27505	51.8903	4.66363	38.2567	85.0572	86.1065	55.7807	33.1389	14.2545
33	67	Lafayette	Lafayette County, Florida	8620	202	2343.39	8651	221	2554.62	8367	255	3047.69	8613	329	3819.81	3819.81	8.24796	10.3694	50.7267	18.2609	7.9495	35.6939	36.1436	3.57822	70.1403	67.1693	6.61743	5.62962	27.2044	79.0035	16.4989	79.748	24.6927	75.3073	20.9494	38.5449	39.2845	1.22614	26.4328	52.294	9.65193	47.7484	5.11248	32.5162	81.8381	86.798	52.7228	34.9398	9.09142
34	69	Lake	Lake County, Florida	325887	11150	3421.43	333598	11663	3496.12	342356	12441	3633.94	354537	15292	4313.23	4313.23	8.36944	12.5708	54.2424	17.8397	7.56734	35.9457	37.577	3.14303	78.9948	57.5926	5.47839	4.09294	33.7972	85.1583	13.6119	73.1663	21.2757	78.7243	32.3324	30.3413	34.0691	3.25715	15.9011	45.287	2.22755	48.8419	6.27411	30.7606	77.6635	82.5592	60.6662	37.6624	16.4254
35	71	Lee	Lee County, Florida	684465	9911	1447.99	700837	14028	2001.61	721053	14176	1966.01	734630	22550	3069.57	3069.57	8.02929	10.1518	63.4628	16.8681	8.9303	28.2411	35.9057	3.3454	80.1935	62.178	6.25033	3.35933	29.5739	87.5489	12.0526	76.3807	20.0512	79.9488	35.5954	24.8327	37.1521	2.4198	14.2417	48.9777	1.91193	49.1376	6.64901	33.511	78.8849	82.8981	64.4188	38.1127	16.8004
36	73	Leon	Leon County, Florida	288495	9790	3393.47	291879	10701	3666.25	290223	11228	3868.75	296717	11654	3927.65	3927.65	8.2758	6.35335	63.9397	16.1687	7.45719	20.9846	25.2995	2.08124	73.4917	53.7007	2.54944	2.23819	18.1557	90.1421	11.9469	77.142	8.59206	91.4079	38.6108	27.512	30.8324	3.04474	14.2614	34.1535	2.56574	45.9657	7.50455	23.5589	72.5439	79.4877	63.9252	25.8874	22.6418
37	75	Levy	Levy County, Florida	40599	1362	3354.76	40832	1597	3911.15	41550	1563	3761.73	41354	1766	4270.45	4270.45	8.35947	14.9633	59.5244	23.5511	6.18677	42.7764	43.2852	5.74692	76.6631	68.7316	5.12718	3.71194	35.4709	79.9818	19.8248	74.0617	28.8873	71.1127	22.9631	35.7602	37.8468	3.42995	22.5733	50.6804	5.78448	49.2287	5.84319	31.31	76.7959	78.0044	54.5378	32.0359	13.2422
38	77	Liberty	Liberty County, Florida	8754	335	3826.82	8839	254	2873.63	8781	348	3963.1	9167	434	4734.37	4734.37	8.4626	9.65564	49.4451	17.1106	6.3897	36.6172	35.7122	1.9422	76.8685	53.0159	6.42228	4.11215	23.9228	83.2397	11.8049	77.5378	27.6985	72.3015	28.0713	34.237	36.7777	0.924048	22.4373	44.6253	12.9247	50.3235	8.21675	27.9214	69.8183	77.9293	57.1464	31.5206	18.3006
39	79	Madison	Madison County, Florida	19252	423	2197.17	19295	613	3176.99	19420	635	3269.82	19533	716	3665.59	3665.59	8.20675	13.702	53.6139	15.8042	3.84473	36.1145	44.6213	3.27224	81.7296	69.6683	4.37154	6.4138	31.7948	84.0444	14.4294	82.4897	23.4127	76.5873	23.6922	44.4976	30.4513	1.35859	16.8709	43.4678	10.4222	49.4672	4.3527	35.4969	81.2804	79.0546	57.6228	27.1944	15.6902
40	81	Manatee	Manatee County, Florida	359486	11323	3149.77	367130	10787	2938.2	381071	11370	2983.7	388729	11161	2871.15	2871.15	7.96247	11.7035	46.7598	16.0132	8.37414	26.9815	34.4956	4.46732	77.7941	58.2118	6.79337	2.18308	27.1118	86.2864	11.6669	74.3856	17.7621	82.2379	36.4835	25.8462	35.8563	1.81398	13.2571	41.1621	3.11986	48.3767	4.63681	32.7793	82.9709	83.7782	66.2805	38.4218	18.0357
41	83	Marion	Marion County, Florida	346956	14587	4204.28	352067	14646	4160	355325	14524	4087.53	360053	17315	4809.01	4809.01	8.47825	16.805	41.4537	18.704	6.31776	38.0491	46.1113	4.86228	83.4004	62.2034	8.14677	6.26814	35.5472	84.853	19.0722	78.2521	26.433	73.567	31.0121	34.9983	31.7802	2.20938	18.2635	47.9105	2.90201	50.2726	3.30468	34.3633	81.1859	78.8249	57.9623	37.5841	10.5539
42	85	Martin	Martin County, Florida	151081	3787	2506.6	152333	3862	2535.24	155705	3697	2374.36	158006	3751	2373.96	2373.96	7.77231	10.3424	71.6341	14.065	10.4599	31.5519	33.629	3.84229	79.2238	67.2569	6.44193	4.27626	28.9276	84.6578	11.9039	77.5991	15.4242	84.5758	43.9338	18.1883	36.4393	1.44034	14.454	46.9343	2.40158	51.5913	4.41174	31.7498	89.2495	89.7256	68.4152	40.1672	13.6365
43	86	Miami-Dade	Miami-Dade County, Florida	2712144	81346	2999.32	2754749	77382	2809.04	2804160	83910	2992.34	2830500	95329	3367.92	3367.92	8.12205	9.79942	37.6676	14.2264	5.44116	28.4101	28.93	3.19292	79.1493	56.8409	4.53971	2.58026	17.7952	83.0744	20.0714	67.3989	22.5921	77.4079	35.9271	27.3058	34.614	2.15298	11.9788	33.2369	1.34097	47.9648	3.76131	27.2792	79.4058	69.8768	64.0243	29.997	18.3551
44	87	Monroe	Monroe County, Florida	76461	2427	3174.17	77300	1920	2483.83	76534	2089	2729.51	73253	2697	3681.76	3681.76	8.21115	7.27864	38.6893	14.4967	12.2149	33.0958	30.0716	2.06049	72.4882	55.8779	4.79453	3.96119	28.0491	79.0545	14.2072	67.613	16.8265	83.1735	34.4171	24.704	39.7391	1.13978	17.5519	47.8362	1.44509	52.5069	5.20122	27.8291	85.5434	82.1313	71.1834	43.2082	17.5281
45	89	Nassau	Nassau County, Florida	78174	2258	2888.43	79592	2821	3544.33	83125	3035	3651.13	85135	3222	3784.58	3784.58	8.23869	12.5872	59.9912	20.8076	8.9313	36.4883	40.9956	2.63666	78.9948	66.1404	5.5289	5.0158	30.7109	84.6234	13.8633	78.092	19.9103	80.0897	28.6248	32.2363	36.3833	2.75553	22.3692	48.9343	5.00677	49.1585	3.65169	36.3943	74.4062	85.8749	62.2719	38.5102	18.755
46	91	Okaloosa	Okaloosa County, Florida	193247	7456	3858.27	194811	7144	3667.14	198409	7121	3589.05	201104	7525	3741.85	3741.85	8.22733	11.8834	76.597	16.2624	8.6285	27.9859	34.5262	4.08805	70.62	57.4348	3.44343	3.40437	24.6611	82.842	15.1982	68.2047	16.7909	83.2091	30.6413	26.4264	40.627	2.30462	19.3379	46.2307	3.44463	50.7798	8.68512	25.1547	73.8158	84.9996	61.9545	38.0588	15.3023
47	93	Okeechobee	Okeechobee County, Florida	40983	2275	5551.08	41469	2314	5580.07	41492	2261	5449.24	41347	2854	6902.56	6902.56	8.83965	13.9987	39.0696	16.3949	4.85093	34.4873	34.4329	2.22938	73.2779	69.5955	5.74939	5.92604	24.8255	76.4567	15.0895	64.2905	26.5892	73.4108	24.6469	35.8142	38.2022	1.33727	20.1136	45.7121	4.14576	43.8138	3.96155	29.4756	79.5794	85.3014	64.9026	29.0902	14.2375
48	95	Orange	Orange County, Florida	1287703	39566	3072.6	1317704	44092	3346.12	1370447	43630	3183.63	1389297	45670	3287.27	3287.27	8.09781	9.45862	53.0879	17.5091	6.89005	25.9189	30.1079	2.46296	75.2225	47.6457	2.95957	3.00797	18.4369	80.8129	15.1786	66.9889	20.1475	79.8525	31.7463	31.2694	34.6876	2.29668	11.6478	31.9774	2.61892	47.1894	6.08984	30.2256	67.3216	73.4606	59.8781	29.2449	16.9691
49	97	Osceola	Osceola County, Florida	326342	13803	4229.61	339470	14751	4345.3	360426	14843	4118.18	368678	15430	4185.22	4185.22	8.33932	15.955	39.3603	15.355	3.1238	30.1688	37.4195	4.15041	75.0094	68.3871	6.38435	4.4173	23.5783	81.3308	20.3412	64.8979	23.5624	76.4376	23.7	32.5251	42.7646	1.01027	12.8108	33.3905	1.23595	46.7021	6.16181	34.9948	75.1831	79.0149	67.925	33.6217	18.5761
50	99	Palm Beach	Palm Beach County, Florida	1395117	34106	2444.67	1411054	33639	2383.96	1442281	31012	2150.21	1458576	35352	2423.73	2423.73	7.79306	10.5388	69.7388	12.4101	6.69787	31.7394	33.8466	2.62091	79.8166	57.8387	4.99461	3.22706	23.1389	85.5593	15.8297	75.441	18.1357	81.8643	37.8325	24.2525	35.2378	2.6773	11.032	38.3744	1.3881	47.4595	5.35865	32.7551	79.7643	84.6292	72.7726	41.9245	13.8346
51	101	Pasco	Pasco County, Florida	497991	15813	3175.36	507081	17731	3496.68	518639	20576	3967.31	527174	20522	3892.83	3892.83	8.26689	11.7418	44.7443	19.7374	6.97629	35.2607	38.4876	3.51805	76.9551	60.9513	6.78473	5.39905	32.3045	86.2998	17.5487	72.432	22.675	77.325	38.2224	26.1388	33.6405	1.99827	21.6081	54.8005	3.79971	50.6353	6.65169	33.876	75.9623	78.0474	61.325	32.0612	19.5756
52	103	Pinellas	Pinellas County, Florida	956302	27978	2925.64	961253	29577	3076.92	971022	34385	3541.11	979558	36602	3736.58	3736.58	8.22593	10.6627	54.6268	17.1932	10.1667	29.704	39.4175	3.1036	79.9242	61.3549	4.85546	4.3022	27.8856	86.8158	15.1383	76.0977	18.2395	81.7605	33.6625	28.3752	35.4153	2.54702	19.6956	51.9682	1.47206	53.0429	8.88374	34.367	74.2897	86.8986	67.461	43.341	18.7243
53	105	Polk	Polk County, Florida	650552	32617	5013.74	663999	38044	5729.53	681691	40429	5930.69	688770	43308	6287.73	6287.73	8.74636	15.4311	58.4248	17.45	4.7046	40.5389	42.1527	5.55345	75.6069	54.7313	6.66196	3.67615	28.6678	81.7244	19.8476	72.2217	24.7851	75.2149	27.0373	36.3332	35.0325	1.59706	17.7702	42.5856	4.86695	43.2726	6.94816	35.7042	76.0744	79.0949	58.2459	32.6675	14.3026
54	107	Putnam	Putnam County, Florida	73004	3533	4839.46	73068	4435	6069.69	73422	4790	6523.93	73012	4918	6735.88	6735.88	8.8152	18.1127	48.0096	23.4606	6.83776	44.5407	44.3006	4.97411	75.824	59.0821	6.96545	4.99555	34.6778	81.1859	21.934	70.63	26.9142	73.0858	28.9755	39.4868	30.2315	1.30673	26.8864	56.9719	3.20399	49.4321	5.85728	36.343	77.4666	80.0756	53.8435	31.1341	15.6087
55	109	St. Johns	St. Johns County, Florida	222006	3781	1703.11	229272	4512	1967.97	241545	4626	1915.17	249734	4707	1884.81	1884.81	7.54158	8.65856	60.0509	19.4271	9.16653	28.8522	35.6039	2.76217	77.3311	58.1548	4.28293	4.12154	24.8681	87.081	14.5469	74.2302	14.2761	85.7239	38.3633	23.9723	34.2993	3.36509	14.5687	43.2448	2.87939	48.7885	5.67634	31.7563	73.7436	90.6167	64.9815	42.3853	15.3004
56	111	St. Lucie	St. Lucie County, Florida	294144	12958	4405.33	299962	13211	4404.22	304743	13521	4436.85	309073	14421	4665.89	4665.89	8.44803	12.2253	51.3133	17.8568	5.46428	36.4956	35.4699	3.32325	74.285	59.9118	5.83477	6.237	28.3617	81.6321	17.1941	70.3936	22.2267	77.7733	28.3017	32.3643	37.7172	1.61683	16.1217	48.4271	1.49228	51.0375	5.09301	36.1501	76.2877	80.9457	65.7444	36.457	15.3985
57	113	Santa Rosa	Santa Rosa County, Florida	168026	6162	3667.29	171851	6096	3547.26	175552	6573	3744.19	179875	7179	3991.1	3991.1	8.29182	10.307	70.3797	21.6861	8.43001	30.6365	33.9586	2.73325	73.3078	56.8053	4.3377	2.94657	30.4586	85.7326	14.2091	78.1362	19.346	80.654	29.5508	32.2002	36.1715	2.07829	21.0934	52.0492	3.68406	51.1104	6.516	31.1318	76.2851	84.0179	59.8185	33.6966	17.0439
58	115	Sarasota	Sarasota County, Florida	401316	9321	2322.61	407501	9236	2266.5	415896	9190	2209.69	426977	9060	2121.89	2121.89	7.66006	10.1656	56.8168	18.7251	9.74172	30.1266	36.0758	2.85247	78.0817	64.3672	4.25116	3.74587	28.4649	88.4643	10.8341	80.2834	14.4181	85.5819	36.4966	22.117	39.8022	1.58387	16.433	51.5142	1.98949	52.4816	6.23255	29.4411	86.8954	85.4547	68.1303	40.4274	20.7799
59	117	Seminole	Seminole County, Florida	450706	10927	2424.42	457028	12501	2735.28	463627	12361	2666.15	472775	12727	2691.98	2691.98	7.89803	9.52786	55.8667	19.4944	7.60109	29.5178	33.1943	2.01736	76.0863	59.2432	2.86196	2.28497	24.4057	84.9367	13.317	70.6589	16.8875	83.1125	36.7025	22.7001	37.5928	3.00461	11.1574	35.8892	2.51888	52.4313	4.86038	27.9499	77.1637	84.8867	69.1052	37.6052	17.4423
60	119	Sumter	Sumter County, Florida	119433	2352	1969.3	123928	2745	2215	125779	3194	2539.37	130642	3953	3025.83	3025.83	8.01494	18.4538	60.325	13.8358	9.54882	29.9814	45.8672	4.49034	89.0842	70.5212	7.61891	6.64805	40.036	90.5457	9.49041	86.0314	17.1069	82.8931	27.3847	27.5483	43.826	1.24112	11.7363	55.4894	3.01713	53.5095	2.60835	40.9544	86.4899	92.8662	66.8654	54.5961	12.1002
61	121	Suwannee	Suwannee County, Florida	44340	2224	5015.79	44527	2029	4556.79	45123	2438	5403.01	45482	2964	6516.86	6516.86	8.78215	15.6152	41.7301	19.8854	7.7061	40.9048	39.7218	7.68953	72.1737	65.3681	8.19094	7.00549	35.5308	80.952	19.2946	71.4353	29.7474	70.2526	22.7924	37.6424	37.6393	1.92479	25.3998	51.3237	7.12794	46.6986	5.41368	31.2325	78.243	78.6194	49.107	30.3492	12.3574
62	123	Taylor	Taylor County, Florida	22400	538	2401.79	22220	968	4356.44	22258	1351	6069.73	22652	1359	5999.47	5999.47	8.69943	15.4556	41.4104	20.9644	5.26705	38.4721	42.6361	4.41502	76.0697	57.6859	6.10577	6.41421	35.1515	81.1077	19.1789	72.364	28.93	71.07	28.527	37.583	30.5442	3.34907	23.8238	50.4261	7.11275	50.046	4.43492	32.1013	78.7402	82.5552	58.3169	32.6646	13.0678
63	125	Union	Union County, Florida	15873	468	2948.4	15896	503	3164.32	15966	513	3213.08	15985	541	3384.42	3384.42	8.12694	11.6105	70.8329	24.7044	1.2653	36.0101	40.6968	6.84374	69.6239	57.7579	5.71598	3.21998	24.5239	84.0722	21.363	73.0558	24.718	75.282	24.8942	38.8702	35.9247	0.308784	32.4084	54.174	7.38108	46.4109	13.1478	31.7389	78.7696	86.2465	50.7326	31.0287	27.53
64	127	Volusia	Volusia County, Florida	519037	16518	3182.43	525121	18583	3538.8	532926	20756	3894.72	539563	25178	4666.37	4666.37	8.44814	14.8226	65.2477	18.8079	7.79711	34.6472	40.9933	4.21327	75.7788	57.878	5.70989	3.52834	32.3603	84.9123	17.5653	76.2905	21.8261	78.1739	30.7951	35.5353	30.7329	2.93692	18.4943	48.5244	2.30394	50.2061	4.573	36.981	74.0558	84.9112	64.4021	38.3804	17.4043
65	129	Wakulla	Wakulla County, Florida	31706	997	3144.52	32134	1088	3385.82	32350	1214	3752.7	32418	1229	3791.1	3791.1	8.24041	13.4037	71.8951	16.6275	11.3107	31.4889	34.4743	1.71594	75.7846	53.9653	4.36354	1.22703	26.8142	83.9359	13.155	76.9113	19.5249	80.4751	21.3183	37.8567	36.6695	4.15469	21.4286	49.8087	9.3026	47.9083	7.04022	31.2655	85.423	80.6067	49.6965	28.2164	19.7971
66	131	Walton	Walton County, Florida	63562	1701	2676.13	65724	1566	2382.69	67926	1909	2810.41	70352	2201	3128.55	3128.55	8.04833	13.3795	61.8639	19.3007	9.38489	38.5263	42.2941	4.76412	69.5955	60.8592	5.25226	5.31154	32.9421	78.3769	21.0411	67.8181	27.4213	72.5787	26.8143	34.341	37.8764	0.967824	28.5858	56.1971	8.40158	47.1344	8.67099	30.873	77.1353	81.6704	60.8649	38.5704	10.9941
67	133	Washington	Washington County, Florida	24880	1024	4115.76	24935	1220	4892.72	25243	1116	4421.03	25347	1146	4521.25	4521.25	8.41654	15.0634	51.758	18.1581	5.6698	38.9336	42.1085	3.53597	74.3288	62.5731	7.2699	6.23751	34.0926	80.9407	19.5652	75.605	26.1078	73.8922	29.7167	38.6204	30.6087	1.05925	22.2111	46.4672	8.67782	48.3944	6.51376	31.3586	77.3487	80.8047	49.5455	33.9809	13.7696
[truncated: 30 more columns]
